# Supplementary material for: A photovoltaic–hydrovoltaic-coupled carbon-based, all-inorganic CsPbBr3 perovskite solar cell
Source: Royal Society of Chemistry journal article supplement (doi:10.1039/d3cc00431g), 2023-01-01
Supplement: d3cc00431g1.pdf [file d3cc00431g1.pdf]

## Supporting Information for

# A photovoltaic-hydrovoltaic coupled carbon-based, all-inorganic CsPbBr<sub>3</sub> perovskite solar cell

Jin Tan, Jie Dou \* and Qunwei Tang

Institute of Carbon Neutrality, College of Chemical and Biological Engineering, Shandong University of Science and Technology, Qingdao 266590, PR China.

## Experimental section

### 1. Fabrication of the PSC devices

The inorganic Cs<sub>0.91</sub>Rb<sub>0.09</sub>PbBr<sub>3</sub> photoactive layer for carbon-based, all-inorganic PSCs was made by a solution-processable multi-step method. In particular, all processes were carried out in the air by controlling the humidity at around 20% RH. Firstly, a satisfactory patterned FTO substrate was obtained by the etching process with zinc powders and 2 M HCl, and then it was thoroughly cleaned in detergent, deionized water, ethanol, and isopropanol. The TiO<sub>2</sub> film includes a compact and a mesoporous layer. The compact layer was spin-coated onto an FTO using an ethanol solution (0.5 M titanium isopropoxide and 0.5 M diethanolamine) at 7000 rpm for 30 s, and annealed at 500 °C for 120 min. Secondly, the mesoporous layer was then spin-coated on the compact layer surface with the as-prepared TiO<sub>2</sub> paste for 30 s before being calcined in air at 450 °C for 30 min. Last, the above substrate was immersed in the 0.04 M TiCl<sub>4</sub> aqueous solution at 70 °C for 30 min, and then annealed at 450 °C 30 min. The above operations are in an atmospheric environment.

The perovskite film was fabricated by a multi-step solution-processing technology. In detail, 1 M PbBr<sub>2</sub> in *N,N*-dimethylformamide solution was spin-coated on the TiO<sub>2</sub> film surface at 2000 rpm for 30 s, and dried at 90 °C for 1 h. Then, the mixed solution (0.07 M CsBr and 0.007 RbBr) methanol was spin-coated on PbBr<sub>2</sub> film at 2000 rpm for 30 s, and heated at 250 °C for 5 min. This step was repeated five times to obtain the suitable perovskite films. After that, the perovskite films were rinsed with isopropanol and dried at 250 °C for 5 min. Finally, a carbon electrode was coated on the perovskite film with carbon paste (Shanghai MaterWin New Materials Co., Ltd.). The active area was controlled at 0.09 cm<sup>2</sup>.

Following that, a paste composed of 30 mg of CB and 30 mL of isopropanol was coated on the as-prepared carbon electrode surface to form the nanochanneled carbon electrode with a thickness of 30 μm. Upon drying at 60 °C in vacuum, the carbon electrode was treated with air plasma (pressure 100 Pa, RF power 60 W) for 120 s in a plasma cleaner

(Dongxin, TS-PL05). Finally, two current-collecting electrodes made from copper wires were set at the top and bottom of the nanochanneled carbon electrode and subsequently encapsulated by ethylene-vinyl acetate copolymer to avoid vapor attacks.

## **2. Characterizations**

The photovoltaic tests were performed in ambient air conditions (20% RH, 25 °C) under illumination by a solar simulator (Newport, 91195A) at AM 1.5G simulated solar illumination ( $100 \text{ mW cm}^{-2}$ ). A black mask was applied to the solar cell surface to avoid stray light. The incident photo-to-current conversion efficiency (IPCE) spectra of various devices were recorded by a power source (Newport 300 W xenon lamp, 66920) with an amonochromator (Newport Cornerstone 260). The electrical performances of all-inorganic PSCs in flowing vapor were measured with self-made equipment, including control systems for temperature, flow velocity, and relative humidity. The voltage and current signals were measured on a CHI660E electrochemical workstation. A fan with controllable speed was used to tune the vapor velocity, and the flow velocity was monitored by a digital anemometer (Smart Sensor AS816). A humidity generator was used to control the relative ambient humidity, and the relative humidity and temperature were monitored by a Center 311 Humidity Temperature Meter. The top view of a carbon electrode was observed by a scanning electron microscope (Hitachi, SU8220). The functional groups were determined by a Raman spectrometer (Thermo DXR Raman Microscope, 532nm laser). The contact angles of water droplets at the carbon electrode were measured by a Zhongchen JC2000DM contact angle meter.

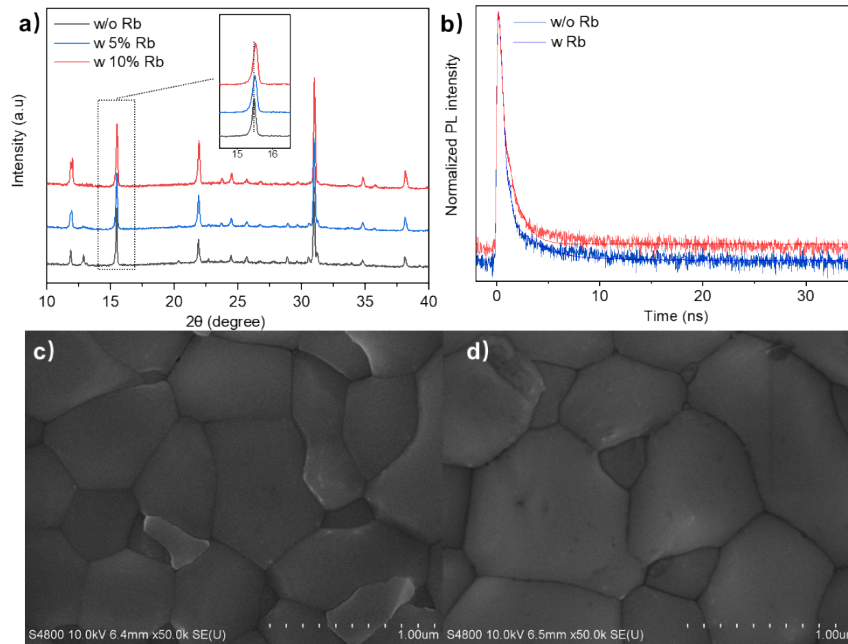

**Figure S1** (a) The XRD patterns and (b) normalized time-resolved decay spectra of perovskite film w/ and w/o Rb<sup>+</sup> doping. Top-view SEM images of (c) w/o and (d) w/ Rb<sup>+</sup> doping.

The peak locates at 2theta of 14°~17° slightly shifts to high angles due to the doping of Rb<sup>+</sup> cation. The TRPL spectra are fitted by the equation  $I=Ae^{-(t-t_0)/\tau_1}+Be^{-(t-t_0)/\tau_2}$ , where A and B are constants for the baseline offset,  $\tau_1$  is related to the nonradiative-recombination of defects,  $\tau_2$  refers to the radiative recombination of electron-hole separation. The device with Rb shows the smallest  $\tau_1$  and largest  $\tau_2$  ( $\tau_1=0.1869$  ns,  $\tau_2=2.476$  ns) in comparison to the  $\tau_1$  of 0.1589 ns and  $\tau_2$  of 1.106 ns for a pristine solar cell. This result demonstrates the nonradiative-recombination in the carbon-based all-inorganic CsPbBr<sub>3</sub> PSC is dramatically inhibited by using the Rb doping. The SEM images reveal large crystals in the Cs<sub>0.91</sub>Rb<sub>0.09</sub>PbBr<sub>3</sub> film, which has been shown to be beneficial for the photovoltaic metrics.

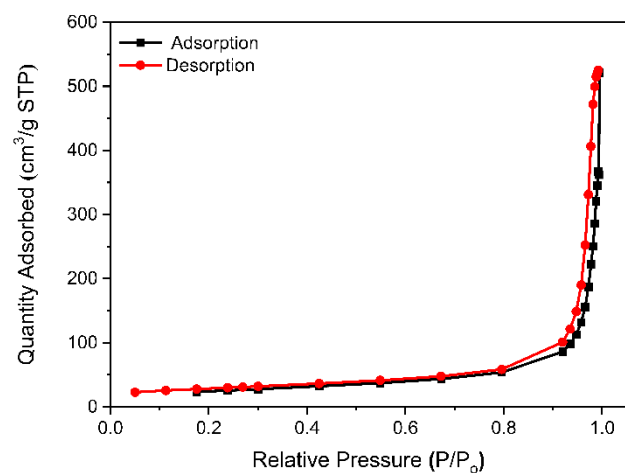

**Figure S2.** The nitrogen adsorption-desorption analysis of the carbon black. The isotherm indicates that the carbon black have a porosity characterization with a distinct hysteresis loop at relative pressure ( $P/P_0$ ) between 0.8-1.0. Calculated by the multipoint Brunauer-Emmett-Teller (BET) method, the porous carbon nanoparticle has a high surface area of  $\sim 86 \text{ m}^2/\text{g}$ .

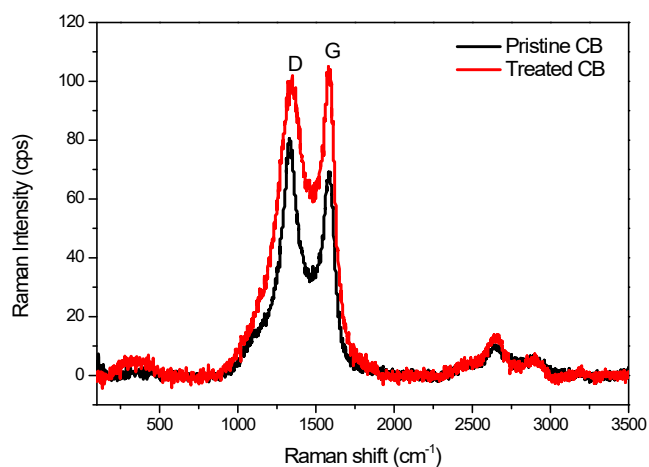

**Figure S3.** Raman spectra of the carbon black film. The black and red curves are the Raman spectra of pristine and treated CB, respectively. The two peaks centred at  $1360 \text{ cm}^{-1}$  (G peak) and  $1580 \text{ cm}^{-1}$  (D peak). There is only one peak at  $1580 \text{ cm}^{-1}$  for complete single crystal graphite, but there will be another peak at  $1360 \text{ cm}^{-1}$  for incomplete single crystal graphite.  $R(I_d/I_g)$  characterizes the degree of graphitization of the carbon material. The results indicate that the carbon black possess the structure analogous to that of graphite with abundant disorder.

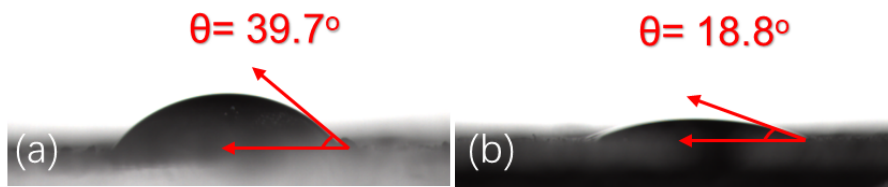

**Figure S4.** Water contact angles of the carbon black films. Pristine CB is hydrophilic. And it can be seen by contrast that the hydrophilicity of treated CB increases dramatically.
